# Supplementary material for: The Survival Benefits of Surgical Resection and Adjuvant Therapy for Patients With Brainstem Glioma
Source: Frontiers journal article supplement (doi:10.3389/fonc.2021.566972), 2021-03-25
Supplement: Data_Sheet_1.PDF [file Data_Sheet_1.PDF]

**Supplement Figure 1** Flowchart of patient with histologically confirmed brainstem glioma selection

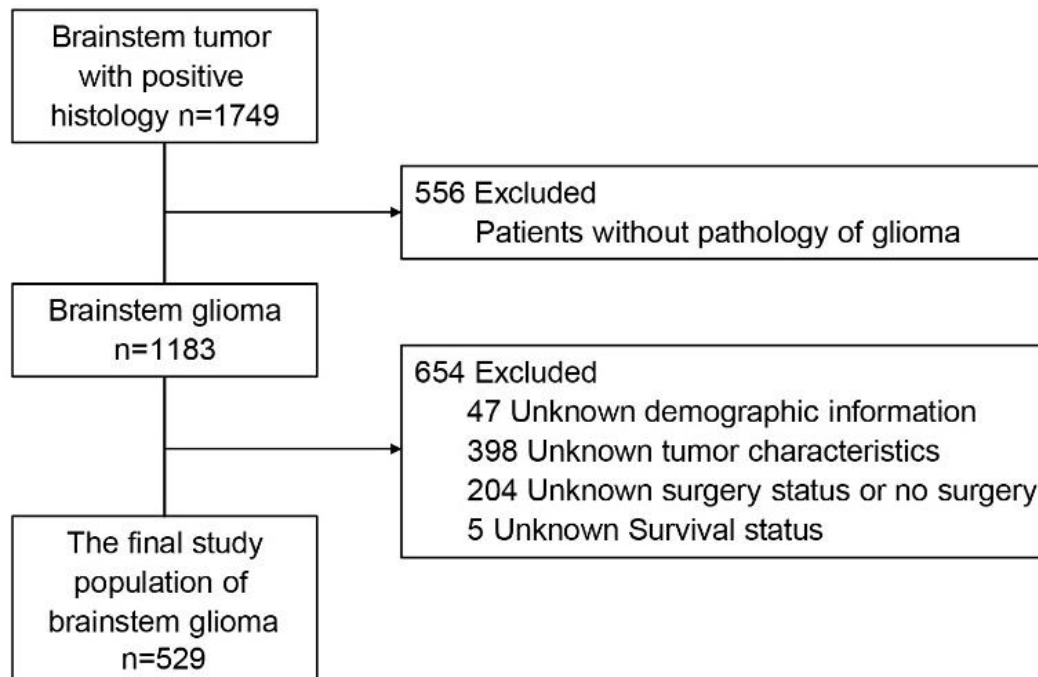

**Supplement Figure2** Kaplan-Meier curves by (A) adjuvant therapy (B) GTP and non-GTP in HGBSG patient group.

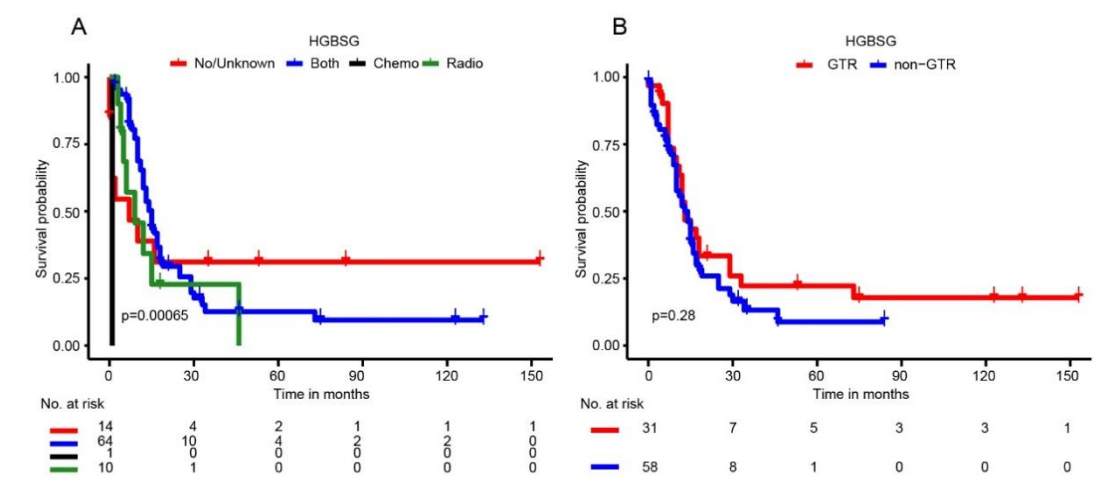

**Supplement Table 1** The distribution of extent of surgery and adjuvant therapy in 4 different patient groups

|                   | Pediatric<br>LGBSG<br>N (%) | Pediatric<br>HGBSG<br>N (%) | Adult<br>LGBSG<br>N (%) | Adult<br>HGBSG<br>N (%) | P-value             |
|-------------------|-----------------------------|-----------------------------|-------------------------|-------------------------|---------------------|
| Population size   | 236 (100)                   | 37 (100)                    | 204 (100)               | 52 (100)                |                     |
| 5-year CSS rates  | 88.6%                       | 18.6%                       | 82.1%                   | 11.3%                   |                     |
| Extent of surgery |                             |                             |                         |                         | <0.001 <sup>†</sup> |
| Biopsy            | 47 (19.9)                   | 11 (29.7)                   | 48 (23.5)               | 21 (40.4)               |                     |
| STR               | 44 (18.6)                   | 12 (32.4)                   | 39 (19.1)               | 14 (26.9)               |                     |
| GTR               | 145 (61.4)                  | 14 (37.8)                   | 117 (57.4)              | 17 (32.7)               |                     |
| Adjuvant Therapy  |                             |                             |                         |                         | <0.001 <sup>†</sup> |
| No/Unknown        | 110 (46.6)                  | 4 (10.8)                    | 101 (49.5)              | 10 (19.2)               |                     |
| Radiotherapy      | 53 (22.5)                   | 4 (10.8)                    | 73 (35.8)               | 6 (11.5)                |                     |
| Chemotherapy      | 46 (19.5)                   | 0 (0.0)                     | 2 (1.0)                 | 1 (1.9)                 |                     |
| Both              | 27 (11.4)                   | 29 (78.4)                   | 14 (6.9)                | 35 (67.3)               |                     |

**Note:** <sup>†</sup>P<0.05, statistically significant.

**Supplement table 2** The result of univariate and multivariate analysis of extent of resection and adjuvant therapy in HGBSG patient groups

| Treatment options | Univariate analysis |                    | Multivariable analysis |                    |
|-------------------|---------------------|--------------------|------------------------|--------------------|
|                   | HR(95%CI)           | P-value            | HR(95%CI)              | P-value            |
| Surgery           |                     |                    |                        |                    |
| Biopsy            | 1 [Reference]       |                    | 1 [Reference]          |                    |
| STR               | 0.57 (0.31-1.03)    | 0.064              | 0.67 (0.33-1.37)       | 0.33               |
| GTR               | 0.59 (0.33-1.02)    | 0.059              | 0.74 (0.40-1.57)       | 0.27               |
| Adjuvant therapy  |                     |                    |                        |                    |
| None/unknown      | 1 [Reference]       |                    | 1 [Reference]          |                    |
| Radiotherapy      | 1.54 (0.58-4.02)    | 0.38               | 1.29 (0.47-3.55)       | 0.621              |
| Chemotherapy      | 22.04(2.37-205.17)  | 0.006 <sup>†</sup> | 10.74(1.03-111.87)     | 0.047 <sup>†</sup> |
| Both              | 1.02 (0.50-2.10)    | 0.95               | 0.61(0.25-1.46)        | 0.27               |

**Supplement Table 3** The distribution of histologic type in pediatric and adult patient groups

|                                         | GTR rate | ALL<br>N (%) | Pediatric<br>N (%) | Adult<br>N (%) |
|-----------------------------------------|----------|--------------|--------------------|----------------|
| Population size                         | 55.3%    | 529(100)     | 273(100)           | 256(100)       |
| Pilocytic astrocytoma (I)               | 58.0%    | 200(37.8)    | 144(52.7)          | 56(21.9)       |
| Astrocytoma, NOS (II)                   | 36.0%    | 50(9.5)      | 26(9.5)            | 24 (9.4)       |
| Diffuse astrocytoma (II)                | 5/10     | 10(1.9)      | 5(1.8)             | 5(2.0)         |
| Ependymoma/anaplastic<br>ependymoma(II) | 68.2%    | 176(33.3)    | 60(22.0)           | 116(45.3)      |
| Oligodendroglioma(II)                   | 1/1      | 1(0.2)       | 1(0.4)             | 0(0.0)         |
| Unique astrocytoma variants(II)         | 2/3      | 3(0.6)       | 0(0.0)             | 3(1.2)         |
| Anaplastic astrocytoma(III)             | 29.6%    | 27(5.1)      | 11(4.0)            | 16(6.3)        |
| Anaplastic<br>oligodendroglioma(III)    | 1/1      | 1(0.2)       | 0(0.0)             | 1(0.4)         |
| Mixed glioma( III)                      | 2/5      | 5(0.9)       | 2(0.7)             | 3(1.2)         |
| Neuroepithelial (III)                   | 1/1      | 1(0.2)       | 1(0.4)             | 0(0.0)         |
| Glioblastoma (IV)                       | 36.4%    | 55(10.4)     | 23(8.4)            | 32(12.5)       |

**Supplement Table 4** Patient demographics, tumor characteristics and treatment options between different histology types in LGBSG group

| <b>Characteristics</b> | <b>EP<br/>N (%)</b> | <b>PA<br/>N (%)</b> | <b>OLG<br/>N (%)</b> | <b>P-Value</b>      |
|------------------------|---------------------|---------------------|----------------------|---------------------|
| Population Size        | 176 (100)           | 200 (100)           | 61 (100)             |                     |
| Age group              |                     |                     |                      | <0.001 <sup>†</sup> |
| Pediatric              | 60 (34.1)           | 144(72.0)           | 32 (52.5)            |                     |
| Adult                  | 116 (65.9)          | 56 (28.0)           | 29 (47.5)            |                     |
| Sex                    |                     |                     |                      | 0.12                |
| Female                 | 73(41.5)            | 104 (52.0)          | 30 (49.2)            |                     |
| Male                   | 103(58.5)           | 96 (48.0)           | 31 (50.8)            |                     |
| Race                   |                     |                     |                      | 0.12                |
| Other                  | 10 (5.7)            | 16 (8.0)            | 0 (0.0)              |                     |
| Black                  | 17 (9.7)            | 14 (0.7)            | 8 (13.1)             |                     |
| White                  | 149 (84.7)          | 170(85.0)           | 53 (86.9)            |                     |
| Marital status         |                     |                     |                      | <0.001 <sup>†</sup> |
| Unmarried              | 96 (54.5)           | 170 (85.0)          | 42 (68.9)            |                     |
| Married                | 80 (45.5)           | 30 (15.0)           | 19 (31.1)            |                     |
| Size                   |                     |                     |                      | 0.36                |
| <4.8cm                 | 128(72.7)           | 157 (78.5)          | 44 (72.1)            |                     |
| ≥4.8cm                 | 48 (27.3)           | 43 (21.5)           | 17 (27.9)            |                     |
| Extension              |                     |                     |                      | <0.001 <sup>†</sup> |
| Brainstem              | 44 (25.0)           | 92 (46.0)           | 35 (57.4)            |                     |
| Cerebellum             | 20 (11.4)           | 18 (9.0)            | 6 (9.8)              |                     |
| Ventricular            | 81 (46.0)           | 58(29.0)            | 8(13.1)              |                     |
| Other                  | 31 (17.6)           | 32 (16.0)           | 12 (19.7)            |                     |
| Metastasis             |                     |                     |                      | 0.91                |
| No                     | 172 (97.7)          | 195 (97.5)          | 59 (96.7)            |                     |
| Yes                    | 4 (2.3)             | 5 (2.5)             | 2 (3.3)              |                     |
| Adjuvant therapy       |                     |                     |                      | <0.001 <sup>†</sup> |
| None/unknown           | 59 (33.5)           | 144 (72.0)          | 18 (29.5)            |                     |
| Both                   | 14 (8.0)            | 8 (4.0)             | 18 (29.5)            |                     |
| Radiotherapy           | 94 (53.4)           | 14 (7.0)            | 20 (32.8)            |                     |
| Chemotherapy           | 9 (5.1)             | 34 (17.0)           | 5 (8.2)              |                     |
| Surgical resection     |                     |                     |                      | <0.001 <sup>†</sup> |
| Biopsy                 | 31(17.6)            | 41(20.5)            | 22(36.1)             |                     |
| STR                    | 25(14.2)            | 43(21.5)            | 15(24.6)             |                     |
| GTR                    | 120(68.2)           | 116(58.0)           | 24(39.3)             |                     |
| Vital status           |                     |                     |                      | <0.001 <sup>†</sup> |
| Alive                  | 143 (81.3)          | 185 (92.5)          | 33 (54.1)            |                     |
| Dead                   | 33 (18.8)           | 15 (7.5)            | 32 (52.5)            |                     |
| Cancer specific vitals |                     |                     |                      | <0.001 <sup>†</sup> |
| Alive                  | 155 (88.1)          | 187 (93.5)          | 33 (54.1)            |                     |
| Dead                   | 21 (11.9)           | 13 (6.5)            | 28 (45.9)            |                     |

**Note:** <sup>†</sup>P<0.05, statistically significant.

**Supplement Table 5** Review of clinical studies of brainstem glioma with histological diagnosis

| Study                       | Patient group                   | N <sup>a</sup> | Surgery related Mortality /Morbidity | GTR rate | Surgical resection                                                             |
|-----------------------------|---------------------------------|----------------|--------------------------------------|----------|--------------------------------------------------------------------------------|
| Sinha S <sup>26</sup>       | Well delineated BSG             | 58             | 5%/19%                               | /        | 90% patients improved neurological status after surgery                        |
| Wang CC <sup>14</sup>       | BSG                             | 311            | 1.3%/27.6 %                          | 40.5%    | LGBSG had higher GTR rate and better survival outcome after surgery            |
| Teo C <sup>19</sup>         | Focal BSG                       | 34             | 0/18.8%                              | 35.2%    | LGBSG had higher GTR rate                                                      |
| Lesniak MS <sup>32</sup>    | Contrast-enhanced Pediatric BSG | 57             | 0/22.7%                              | 50.8%    | Juvenile pilocytic astrocytoma had the best survival outcome after surgery.    |
| Mottolese C <sup>20</sup>   | Tectal plate Pediatric BSG      | 27             | 0/18.5%                              | 60%      | Exophytic Tectal plate glioma could be treated with surgical resection safely. |
| Sun T <sup>24</sup>         | Pediatric BSG                   | 33             | /                                    | 21.2%    | LGBSG has better survival outcome after surgery.                               |
| Holzapfel J <sup>15</sup>   | Pediatric LGBSG                 | 116            | 0/21%                                | 10%      | GTR significantly related to better PFS but not OS.                            |
| Upadhyay a SA <sup>16</sup> | Pediatric LGBSG                 | 23             | 0/21.7%                              | 17.4%    | GTR was related to better survival outcome but not significantly.              |
| Sandri A <sup>29</sup>      | Focal Pediatric LGBSG           | 17             | 0/17.6%                              | 13.5%    | GTR was significantly related to better PFS but not OS.                        |
| Ahmed KA <sup>17</sup>      | Pediatric LGBSG                 | 48             | /                                    | 8.3%     | Surgical resection significantly improved survival outcome                     |
| Klimo P Jr <sup>28</sup>    | Pediatric LGBSG                 | 52             | 9.6%/36.5%                           | 17%      | GTR was significantly related to better PFS but not OS.                        |
| Tasic G <sup>31</sup>       | Adult BSG                       | 48             | /                                    | 3.9%     | LGBSG had better survival outcome after surgery.                               |
| Reithmeier T <sup>22</sup>  | Adult BSG                       | 104            | 0/11.6%                              | 2%       | GTR was not significantly related to survival outcome                          |
| Kesari S <sup>21</sup>      | Adult BSG                       | 28             | 0/29%                                | /        | GTR was not significantly related with survival outcome                        |
| Majchrzak K <sup>13</sup>   | Adult BSG                       | 47             | 4.2%/45%                             | 30%      | Focal tectal and exophytic BSG and had higher GTR rate and better prognosis    |

**Note:** N<sup>a</sup>, number of patients with histological diagnosis in the study cohort.
